# Supplementary material for: Direct, enantioselective α-alkylation of aldehydes using simple olefins
Source: Springer Nature journal article supplement (doi:10.1038/nchem.2797), 2017-06-26
Supplement: 41557_2017_BFnchem2797_MOESM21_ESM.mol [file 41557_2017_BFnchem2797_MOESM21_ESM.mol]

nchem.2797-comp17.mol
  ChemDraw06071714312D

 36 40  0  0  1  0  0  0  0  0999 V2000
   -1.4263    0.8547    0.0000 C   0  0  0  0  0  0  0  0  0  0  0  0
   -2.1410    0.4419    0.0000 C   0  0  0  0  0  0  0  0  0  0  0  0
   -2.1410   -0.3802    0.0000 C   0  0  0  0  0  0  0  0  0  0  0  0
   -0.7221   -0.3802    0.0000 C   0  0  0  0  0  0  0  0  0  0  0  0
   -0.7221    0.4390    0.0000 C   0  0  0  0  0  0  0  0  0  0  0  0
   -0.0109    0.8455    0.0000 C   0  0  0  0  0  0  0  0  0  0  0  0
    0.6968    0.4327    0.0000 C   0  0  0  0  0  0  0  0  0  0  0  0
    0.7796   -0.3911    0.0000 C   0  0  0  0  0  0  0  0  0  0  0  0
    1.5885   -0.5665    0.0000 N   0  0  0  0  0  0  0  0  0  0  0  0
    1.4545    0.7662    0.0000 C   0  0  0  0  0  0  0  0  0  0  0  0
   -1.4263    1.6797    0.0000 C   0  0  0  0  0  0  0  0  0  0  0  0
   -0.7123    2.0919    0.0000 O   0  0  0  0  0  0  0  0  0  0  0  0
   -1.4315   -0.7895    0.0000 N   0  0  0  0  0  0  0  0  0  0  0  0
   -0.0029    0.0355    0.0000 C   0  0  0  0  0  0  0  0  0  0  0  0
   -0.0029    0.8605    0.0000 C   0  0  0  0  0  0  0  0  0  0  0  0
    0.7117    1.2727    0.0000 C   0  0  0  0  0  0  0  0  0  0  0  0
    1.4263    0.8605    0.0000 C   0  0  0  0  0  0  0  0  0  0  0  0
    1.4263    0.0355    0.0000 C   0  0  0  0  0  0  0  0  0  0  0  0
    0.7117   -0.3773    0.0000 C   0  0  0  0  0  0  0  0  0  0  0  0
    2.1410    1.2727    0.0000 C   0  0  0  0  0  0  0  0  0  0  0  0
   -0.7169   -0.3773    0.0000 S   0  0  0  0  0  0  0  0  0  0  0  0
   -1.1297    0.3373    0.0000 O   0  0  0  0  0  0  0  0  0  0  0  0
   -0.3047   -1.0919    0.0000 O   0  0  0  0  0  0  0  0  0  0  0  0
    2.0059    0.1481    0.0000 N   0  0  0  0  0  0  0  0  0  0  0  0
    1.5965    0.8645    0.0000 C   0  0  0  0  0  0  0  0  0  0  0  0
    2.0122    1.5774    0.0000 C   0  0  0  0  0  0  0  0  0  0  0  0
    1.6028    2.2937    0.0000 C   0  0  0  0  0  0  0  0  0  0  0  0
    0.7778    2.2971    0.0000 C   0  0  0  0  0  0  0  0  0  0  0  0
    0.3622    1.5848    0.0000 C   0  0  0  0  0  0  0  0  0  0  0  0
    0.7715    0.8685    0.0000 C   0  0  0  0  0  0  0  0  0  0  0  0
    0.1638   -0.9402    0.0000 C   0  0  0  0  0  0  0  0  0  0  0  0
   -0.6196   -0.6814    0.0000 C   0  0  0  0  0  0  0  0  0  0  0  0
   -1.2354   -1.2305    0.0000 C   0  0  0  0  0  0  0  0  0  0  0  0
   -1.0678   -2.0384    0.0000 C   0  0  0  0  0  0  0  0  0  0  0  0
   -0.2843   -2.2971    0.0000 C   0  0  0  0  0  0  0  0  0  0  0  0
    0.3315   -1.7480    0.0000 C   0  0  0  0  0  0  0  0  0  0  0  0
  1 11  1  6      
 11 12  2  0      
  3 13  1  0      
  4 13  1  0      
 13 21  1  0      
 14 15  2  0      
 15 16  1  0      
 16 17  2  0      
 17 18  1  0      
 18 19  2  0      
 14 19  1  0      
 17 20  1  0      
 14 21  1  0      
 21 22  2  0      
 21 23  2  0      
  9 24  1  0      
 10 24  1  0      
 24 25  1  0      
 25 26  2  0      
 26 27  1  0      
 27 28  2  0      
 28 29  1  0      
 29 30  2  0      
 25 30  1  0      
 31 32  2  0      
 32 33  1  0      
 33 34  2  0      
 34 35  1  0      
 35 36  2  0      
 31 36  1  0      
  8 31  1  0      
  1  2  1  0      
  2  3  1  0      
  4  5  1  0      
  5  6  1  1      
  1  5  1  0      
  6  7  1  0      
  7  8  1  0      
  8  9  2  0      
 10  7  2  0      
M  STY  1   1 SUP
M  SLB  1   1   1
M  SAL   1  2  11  12
M  SBL   1  1   1
M  SMT   1 CHO
M  SBV   1   1    0.0000   -0.8250
M  STY  1   2 SUP
M  SLB  1   2   2
M  SAL   2 11  13  14  15  16  17  18  19  20  21  22  23
M  SBL   2  2   3   4
M  SMT   2 NTs
M  SBV   2   3   -0.7094    0.4093
M  SBV   2   4    0.7094    0.4093
M  STY  1   3 SUP
M  SLB  1   3   3
M  SAL   3  7  24  25  26  27  28  29  30
M  SBL   3  2  16  17
M  SMT   3 NPh
M  SBV   3  16   -0.4174   -0.7146
M  SBV   3  17   -0.5513    0.6180
M  STY  1   4 SUP
M  SLB  1   4   4
M  SAL   4  6  31  32  33  34  35  36
M  SBL   4  1  31
M  SMT   4 ^Ph
M  SBV   4  31    0.6157    0.5490
M  END
