# Supplementary material for: Direct, enantioselective α-alkylation of aldehydes using simple olefins
Source: Springer Nature journal article supplement (doi:10.1038/nchem.2797), 2017-06-26
Supplement: 41557_2017_BFnchem2797_MOESM24_ESM.mol [file 41557_2017_BFnchem2797_MOESM24_ESM.mol]

nchem.2797-comp18.mol
  ChemDraw06071714312D

 25 25  0  0  1  0  0  0  0  0999 V2000
    0.1782    1.6302    0.0000 C   0  0  0  0  0  0  0  0  0  0  0  0
   -0.5364    1.2174    0.0000 C   0  0  0  0  0  0  0  0  0  0  0  0
   -0.5364    0.3953    0.0000 C   0  0  0  0  0  0  0  0  0  0  0  0
    0.1731   -0.0141    0.0000 C   0  0  0  0  0  0  0  0  0  0  0  0
    0.8825    0.3953    0.0000 C   0  0  0  0  0  0  0  0  0  0  0  0
    0.8825    1.2145    0.0000 C   0  0  0  0  0  0  0  0  0  0  0  0
    1.5937    1.6210    0.0000 C   0  0  0  0  0  0  0  0  0  0  0  0
    0.1782    2.4552    0.0000 C   0  0  0  0  0  0  0  0  0  0  0  0
    0.8923    2.8674    0.0000 O   0  0  0  0  0  0  0  0  0  0  0  0
    1.5977    2.4374    0.0000 C   0  0  0  0  0  0  0  0  0  0  0  0
    2.2991    1.2094    0.0000 C   0  0  0  0  0  0  0  0  0  0  0  0
   -0.2369   -0.7235    0.0000 C   0  0  0  0  0  0  0  0  0  0  0  0
    0.1759   -1.4382    0.0000 O   0  0  0  0  0  0  0  0  0  0  0  0
   -1.0619   -0.7235    0.0000 O   0  0  0  0  0  0  0  0  0  0  0  0
   -1.4741   -1.4382    0.0000 C   0  0  0  0  0  0  0  0  0  0  0  0
   -2.2991   -1.4382    0.0000 C   0  0  0  0  0  0  0  0  0  0  0  0
   -1.8869   -2.1528    0.0000 C   0  0  0  0  0  0  0  0  0  0  0  0
   -1.0619   -2.1528    0.0000 C   0  0  0  0  0  0  0  0  0  0  0  0
    0.5824   -0.7235    0.0000 C   0  0  0  0  0  0  0  0  0  0  0  0
    1.4074   -0.7235    0.0000 O   0  0  0  0  0  0  0  0  0  0  0  0
    0.1702   -1.4382    0.0000 O   0  0  0  0  0  0  0  0  0  0  0  0
    0.5824   -2.1528    0.0000 C   0  0  0  0  0  0  0  0  0  0  0  0
    0.1702   -2.8674    0.0000 C   0  0  0  0  0  0  0  0  0  0  0  0
    0.9952   -2.8674    0.0000 C   0  0  0  0  0  0  0  0  0  0  0  0
    1.4074   -2.1528    0.0000 C   0  0  0  0  0  0  0  0  0  0  0  0
  1  8  1  6      
  8  9  2  0      
  7 10  1  0      
  7 11  1  0      
 15 16  1  0      
 15 17  1  0      
 15 18  1  0      
 14 15  1  0      
 12 13  2  0      
 12 14  1  0      
  4 12  1  0      
 22 23  1  0      
 22 24  1  0      
 22 25  1  0      
 21 22  1  0      
 19 20  2  0      
 19 21  1  0      
  4 19  1  0      
  1  2  1  0      
  2  3  1  0      
  3  4  1  0      
  4  5  1  0      
  5  6  1  0      
  6  7  1  1      
  1  6  1  0      
M  STY  1   1 SUP
M  SLB  1   1   1
M  SAL   1  2   8   9
M  SBL   1  1   1
M  SMT   1 CHO
M  SBV   1   1    0.0000   -0.8250
M  STY  1   2 SUP
M  SLB  1   2   2
M  SAL   2  1  10
M  SBL   2  1   3
M  SMT   2 Me
M  SBV   2   3   -0.0040   -0.8164
M  STY  1   3 SUP
M  SLB  1   3   3
M  SAL   3  1  11
M  SBL   3  1   4
M  SMT   3 Me
M  SBV   3   4   -0.7054    0.4116
M  STY  1   4 SUP
M  SLB  1   4   4
M  SAL   4  7  12  13  14  15  16  17  18
M  SBL   4  1  11
M  SMT   4 ^CO2t-Bu
M  SBV   4  11    0.4099    0.7095
M  STY  1   5 SUP
M  SLB  1   5   5
M  SAL   5  7  19  20  21  22  23  24  25
M  SBL   5  1  18
M  SMT   5 CO2t-Bu
M  SBV   5  18   -0.4093    0.7095
M  END
