# Supplementary material for: Direct, enantioselective α-alkylation of aldehydes using simple olefins
Source: Springer Nature journal article supplement (doi:10.1038/nchem.2797), 2017-06-26
Supplement: 41557_2017_BFnchem2797_MOESM39_ESM.mol [file 41557_2017_BFnchem2797_MOESM39_ESM.mol]

nchem.2797-comp23.mol
  ChemDraw06071714312D

 22 23  0  0  1  0  0  0  0  0999 V2000
   -2.1445   -0.0667    0.0000 C   0  0  0  0  0  0  0  0  0  0  0  0
   -2.1445   -0.8946    0.0000 C   0  0  0  0  0  0  0  0  0  0  0  0
   -0.7106   -0.8946    0.0000 C   0  0  0  0  0  0  0  0  0  0  0  0
    0.0063    0.3473    0.0000 C   0  0  0  0  0  0  0  0  0  0  0  0
   -1.4011    0.3513    0.0000 C   0  0  0  0  0  0  0  0  0  0  0  0
   -0.6962   -0.0644    0.0000 C   0  0  0  0  0  0  0  0  0  0  0  0
   -1.4275   -1.3085    0.0000 N   0  0  0  0  0  0  0  0  0  0  0  0
    0.0011   -0.4835    0.0000 C   0  0  0  0  0  0  0  0  0  0  0  0
    0.0011    0.3415    0.0000 C   0  0  0  0  0  0  0  0  0  0  0  0
    0.7158    0.7537    0.0000 C   0  0  0  0  0  0  0  0  0  0  0  0
    1.4304    0.3415    0.0000 C   0  0  0  0  0  0  0  0  0  0  0  0
    1.4304   -0.4835    0.0000 C   0  0  0  0  0  0  0  0  0  0  0  0
    0.7158   -0.8957    0.0000 C   0  0  0  0  0  0  0  0  0  0  0  0
    2.1445    0.7537    0.0000 C   0  0  0  0  0  0  0  0  0  0  0  0
   -0.7129   -0.8957    0.0000 S   0  0  0  0  0  0  0  0  0  0  0  0
   -1.1257   -0.1817    0.0000 O   0  0  0  0  0  0  0  0  0  0  0  0
   -0.3007   -1.6104    0.0000 O   0  0  0  0  0  0  0  0  0  0  0  0
   -1.4275    1.1751    0.0000 C   0  0  0  0  0  0  0  0  0  0  0  0
   -0.7267    1.6104    0.0000 O   0  0  0  0  0  0  0  0  0  0  0  0
    0.0063   -0.4806    0.0000 C   0  0  0  0  0  0  0  0  0  0  0  0
    0.7233   -0.0667    0.0000 C   0  0  0  0  0  0  0  0  0  0  0  0
    0.0063    1.1751    0.0000 C   0  0  0  0  0  0  0  0  0  0  0  0
 15 16  2  0      
 15 17  2  0      
 12 13  2  0      
 11 12  1  0      
 11 14  1  0      
 10 11  2  0      
  9 10  1  0      
  8  9  2  0      
  8 13  1  0      
  8 15  1  0      
  7 15  1  0      
  2  7  1  0      
  3  7  1  0      
 18 19  2  0      
  5 18  1  6      
  6 20  1  6      
  4 21  1  0      
  4 22  1  0      
  1  2  1  0      
  5  6  1  0      
  1  5  1  0      
  6  4  1  0      
  6  3  1  0      
M  STY  1   1 SUP
M  SLB  1   1   1
M  SAL   1 11   7   8   9  10  11  12  13  14  15  16  17
M  SBL   1  2  12  13
M  SMT   1 NTs
M  SBV   1  12   -0.7169    0.4139
M  SBV   1  13    0.7169    0.4139
M  STY  1   2 SUP
M  SLB  1   2   2
M  SAL   2  2  18  19
M  SBL   2  1  15
M  SMT   2 CHO
M  SBV   2  15    0.0264   -0.8239
M  STY  1   3 SUP
M  SLB  1   3   3
M  SAL   3  1  20
M  SBL   3  1  16
M  SMT   3 Me
M  SBV   3  16   -0.7026    0.4162
M  STY  1   4 SUP
M  SLB  1   4   4
M  SAL   4  1  21
M  SBL   4  1  17
M  SMT   4 Me
M  SBV   4  17   -0.7169    0.4139
M  STY  1   5 SUP
M  SLB  1   5   5
M  SAL   5  1  22
M  SBL   5  1  18
M  SMT   5 Me
M  SBV   5  18    0.0000   -0.8279
M  END
