# Supplementary material for: Direct, enantioselective α-alkylation of aldehydes using simple olefins
Source: Springer Nature journal article supplement (doi:10.1038/nchem.2797), 2017-06-26
Supplement: 41557_2017_BFnchem2797_MOESM84_ESM.mol [file 41557_2017_BFnchem2797_MOESM84_ESM.mol]

nchem.2797-comp39.mol
  ChemDraw06071714312D

 24 25  0  0  1  0  0  0  0  0999 V2000
   -0.2108    1.0086    0.0000 C   0  0  0  0  0  0  0  0  0  0  0  0
   -3.1033    1.8247    0.0000 O   0  0  0  0  0  0  0  0  0  0  0  0
   -3.1033    0.9997    0.0000 C   0  0  0  0  0  0  0  0  0  0  0  0
   -2.3888    0.5872    0.0000 C   0  0  0  0  0  0  0  0  0  0  0  0
   -3.8178    0.5872    0.0000 H   0  0  0  0  0  0  0  0  0  0  0  0
   -2.3888   -0.2378    0.0000 C   0  0  0  0  0  0  0  0  0  0  0  0
   -1.6744    0.9997    0.0000 C   0  0  0  0  0  0  0  0  0  0  0  0
   -0.9254    0.5963    0.0000 C   0  0  0  0  0  0  0  0  0  0  0  0
    0.5453    0.6716    0.0000 C   0  0  0  0  0  0  0  0  0  0  0  0
    0.6858    2.0036    0.0000 N   0  0  0  0  0  0  0  0  0  0  0  0
   -0.1239    1.8318    0.0000 C   0  0  0  0  0  0  0  0  0  0  0  0
   -1.6744   -0.6503    0.0000 C   0  0  0  0  0  0  0  0  0  0  0  0
   -1.6744   -1.4753    0.0000 C   0  0  0  0  0  0  0  0  0  0  0  0
   -0.9599   -1.8878    0.0000 C   0  0  0  0  0  0  0  0  0  0  0  0
   -0.9599   -2.7128    0.0000 C   0  0  0  0  0  0  0  0  0  0  0  0
   -0.2454   -3.1253    0.0000 C   0  0  0  0  0  0  0  0  0  0  0  0
    1.0995    1.2866    0.0000 N   0  0  0  0  0  0  0  0  0  0  0  0
    2.4586    1.7276    0.0000 C   0  0  0  0  0  0  0  0  0  0  0  0
    3.2655    1.5558    0.0000 C   0  0  0  0  0  0  0  0  0  0  0  0
    3.8178    2.1687    0.0000 C   0  0  0  0  0  0  0  0  0  0  0  0
    3.5631    2.9534    0.0000 C   0  0  0  0  0  0  0  0  0  0  0  0
    2.7562    3.1253    0.0000 C   0  0  0  0  0  0  0  0  0  0  0  0
    2.2040    2.5124    0.0000 C   0  0  0  0  0  0  0  0  0  0  0  0
    1.9064    1.1147    0.0000 C   0  0  0  0  0  0  0  0  0  0  0  0
  9 17  1  0      
 10 17  1  0      
 17 24  1  0      
 18 19  2  0      
 19 20  1  0      
 20 21  2  0      
 21 22  1  0      
 22 23  2  0      
 18 23  1  0      
 18 24  1  0      
  2  3  2  0      
  3  4  1  0      
  3  5  1  0      
  4  6  1  0      
  4  7  1  1      
  1  8  1  0      
  7  8  1  0      
  1  9  2  0      
 10 11  2  0      
 11  1  1  0      
  6 12  1  0      
 12 13  1  0      
 13 14  1  0      
 14 15  1  0      
 15 16  1  0      
M  STY  1   1 SUP
M  SLB  1   1   1
M  SAL   1  8  17  18  19  20  21  22  23  24
M  SBL   1  2   1   2
M  SMT   1 NBn
M  SBV   1   1   -0.5541   -0.6150
M  SBV   1   2   -0.4136    0.7170
M  END
