# Supplementary material for: Direct, enantioselective α-alkylation of aldehydes using simple olefins
Source: Springer Nature journal article supplement (doi:10.1038/nchem.2797), 2017-06-26
Supplement: 41557_2017_BFnchem2797_MOESM87_ESM.mol [file 41557_2017_BFnchem2797_MOESM87_ESM.mol]

nchem.2797-comp40.mol
  ChemDraw06071714312D

 18 18  0  0  1  0  0  0  0  0999 V2000
    1.0870    2.2742    0.0000 C   0  0  0  0  0  0  0  0  0  0  0  0
    1.0870    1.4456    0.0000 C   0  0  0  0  0  0  0  0  0  0  0  0
    1.8029    1.0316    0.0000 C   0  0  0  0  0  0  0  0  0  0  0  0
    2.5200    1.4456    0.0000 N   0  0  0  0  0  0  0  0  0  0  0  0
    2.5200    2.2742    0.0000 C   0  0  0  0  0  0  0  0  0  0  0  0
    1.8029    2.6882    0.0000 C   0  0  0  0  0  0  0  0  0  0  0  0
   -1.8055    2.2618    0.0000 O   0  0  0  0  0  0  0  0  0  0  0  0
   -1.8055    1.4368    0.0000 C   0  0  0  0  0  0  0  0  0  0  0  0
   -1.0911    1.0243    0.0000 C   0  0  0  0  0  0  0  0  0  0  0  0
   -2.5200    1.0243    0.0000 H   0  0  0  0  0  0  0  0  0  0  0  0
   -1.0911    0.1993    0.0000 C   0  0  0  0  0  0  0  0  0  0  0  0
   -0.3766    1.4368    0.0000 C   0  0  0  0  0  0  0  0  0  0  0  0
    0.3724    1.0334    0.0000 C   0  0  0  0  0  0  0  0  0  0  0  0
   -0.3766   -0.2132    0.0000 C   0  0  0  0  0  0  0  0  0  0  0  0
   -0.3766   -1.0382    0.0000 C   0  0  0  0  0  0  0  0  0  0  0  0
    0.3379   -1.4507    0.0000 C   0  0  0  0  0  0  0  0  0  0  0  0
    0.3379   -2.2757    0.0000 C   0  0  0  0  0  0  0  0  0  0  0  0
    1.0524   -2.6882    0.0000 C   0  0  0  0  0  0  0  0  0  0  0  0
  1  2  2  0      
  2  3  1  0      
  3  4  2  0      
  4  5  1  0      
  5  6  2  0      
  6  1  1  0      
  7  8  2  0      
  8  9  1  0      
  8 10  1  0      
  9 11  1  0      
  9 12  1  1      
  2 13  1  0      
 12 13  1  0      
 11 14  1  0      
 14 15  1  0      
 15 16  1  0      
 16 17  1  0      
 17 18  1  0      
M  END
